# Supplementary material
Source: PubMed Central journal article supplement (PMC10293772)
Supplement: mmc2.pdf [file mmc2.pdf]

**TABLE S1 | Immunohistochemistry Procedures and List of Antibodies**

Immunohistochemistry, except for staining for citrullinated histone H3 and DNA counterstain by the Feulgen method that was executed exactly as described (Obermayer et al.), was performed as per ISO15189 accredited standard diagnostic operating procedures of our institute on an automated stainer (Benchmark Ultra from Roche/Ventana Medical Systems, Tucson, AZ, USA). A list of all utilized antibodies, their dilutions and incubation conditions, and the antigen retrieval procedures are listed in Table S1. To verify/falsify VWF expression in lymph node histiocytes, VWF (AEC-based red read-out)/PU1 (DAB-based brown read-out) double stains were applied; these double stains were performed analogously to what was described elsewhere (Sterlacci W, Savic S, Schmid T, Oberaigner W, Auberger J, Fiegl M, Tzankov A. Tissue-sparing application of the newly proposed IASLC/ATS/ERS classification of adenocarcinoma of the lung shows practical diagnostic and prognostic impact. *Am J Clin Pathol.* 2012 Jun;137(6):946-56. doi: 10.1309/AJCP77KMKJXNMPMS. PMID: 22586054).

**TABLE S1 |**

| <b>Marker</b>            | <b>Antibody source &amp; clone or provider catalogue number</b> | <b>Retrieval Dilution Incubation</b>                                |
|--------------------------|-----------------------------------------------------------------|---------------------------------------------------------------------|
| CD42b                    | Neomarkers<br>Clone 42C01                                       | CC1 16 min<br>Ready-to-use<br>12 min                                |
| Fibrin                   | Dako A0080<br>Rabbit polyclonal                                 | Pronase 30 min<br>1:100000<br>overnight                             |
| F VIII-R<br>(VWF)        | Ventana 760-2642<br>Rabbit polyclonal                           | CC1 24 min<br>Ready-to-use<br>20 min                                |
| PU1                      | Abcam<br>Clone EPR3158Y                                         | CC1 32 min<br>1:800<br>28 min                                       |
| Citrullinated histone H3 | Abcam ab5103<br>Rabbit polyclonal                               | Citrate buffer (pH 6.7) at 95°C microwave 10 min<br>1:100<br>60 min |

**TABLE S2 | Comorbidities and Medication**

|                                                  | COVID-19                        | Control lungs                   | Control hearts               | Control lymph nodes            | All controls                     | P-values of differences COVID-19 vs. |                  |                  |              |
|--------------------------------------------------|---------------------------------|---------------------------------|------------------------------|--------------------------------|----------------------------------|--------------------------------------|------------------|------------------|--------------|
|                                                  | (n=28)                          | (n=24)                          | (n=9)                        | (n=23)                         | (n=51**)                         | Lungs only                           | Hearts only      | Lymph nodes      | All controls |
| <b>A. Comorbidities</b>                          |                                 |                                 |                              |                                |                                  |                                      |                  |                  |              |
| Hypertension (%)                                 | 20 of 25 (80%)                  | 11 of 23 (48%)                  | 4 of 9 (44%)                 | 4 of 19 (21%)                  | 17 of 46 (37%)                   | <b>0.034</b>                         | 0.082            | <b>&lt;0.001</b> | <b>0.001</b> |
| Coronary artery disease (%)                      | 12 of 26 (46%)                  | 8 of 22 (36%)                   | 2 of 9 (22%)                 | 4 of 19 (21%)                  | 10 of 45 (22%)                   | 0.565                                | 0.249            | 0.476            | 0.061        |
| Diabetes mellitus (%)                            | 7 of 24 (29%)                   | 7 of 22 (32%)                   | 1 of 9 (11%)                 | 5 of 19 (26%)                  | 10 of 44 (23%)                   | 1.0                                  | 0.633            | 0.728            | 0.571        |
| COPD (%)                                         | 4 of 25 (16%)                   | 4 of 21 (19%)                   | 1 of 9 (11%)                 | 4 of 19 (21%)                  | 6 of 43 (14%)                    | 1.0                                  | 1.0              | 0.660            | 1.0          |
| Malignancy (%)                                   | 7 of 25 (28%)                   | 8 of 22 (36%)                   | 6 of 9 (67%)                 | 7 of 19 (37%)                  | 19 of 44 (43%)                   | 0.755                                | <b>0.038</b>     | 0.728            | 0.302        |
| Smoking                                          | 9 of 15 (60%)                   | 7 of 16 (43%)                   | 5 of 9 (56%)                 | 12 of 16 (75%)                 | 20 of 35 (57%)                   | 0.479                                | 0.191            | 0.149            | 0.119        |
| Active (%)                                       | 0 of 15 (0%)                    | 0 of 16 (0%)                    | 2 of 9 (22%)                 | 5 of 16 (31%)                  | 7 of 35 (20%)                    |                                      |                  |                  |              |
| History of (%)                                   | 9 of 15 (60%)                   | 7 of 16 (43%)                   | 3 of 9 (33%)                 | 7 of 16 (44%)                  | 13 of 35 (37%)                   |                                      |                  |                  |              |
| <b>B. Medication</b>                             |                                 |                                 |                              |                                |                                  |                                      |                  |                  |              |
| Anticoagulation therapeutic (%)                  | 20 of 24 (83%)                  | 18 of 20 (90%)                  | 5 of 7 (71%)                 | 9 of 14 (64%)                  | 27 of 36 (75%)                   | 0.673                                | 0.588            | 0.435            | 0.534        |
| prophylactic (%)                                 | 7 of 24 (29%)<br>13 of 24 (54%) | 8 of 20 (40%)<br>10 of 20 (50%) | 4 of 7 (57%)<br>1 of 7 (14%) | 2 of 14 (14%)<br>7 of 14 (50%) | 12 of 36 (33%)<br>15 of 36 (42%) |                                      |                  |                  |              |
| Anticoagulation BEFORE admission therapeutic (%) | 6 of 20 (30%)                   | 5 of 20 (25%)                   | 2 of 7 (29%)                 | 1 of 18 (6%)                   | 7 of 40 (18%)                    | 1.0                                  | 1.0              | 0.102            | 0.390        |
| prophylactic (%)                                 | 4 of 20 (20%)<br>2 of 20 (10%)  | 4 of 20 (20%)<br>1 of 20 (5%)   | 2 of 7 (29%)<br>0 of 7 (0%)  | 1 of 18 (6%)<br>0 of 18 (0%)   | 6 of 40 (15%)<br>1 of 40 (3%)    |                                      |                  |                  |              |
| Platelet aggregation inhibition (%)              | 7 of 22 (32%)                   | 3 of 19 (16%)                   | 0 of 7 (0%)                  | 3 of 17 (17%)                  | 4 of 38 (11%)                    | 0.292                                | 0.134            | 0.688            | 0.80         |
| Steroids (%)                                     | 2 of 26 (8%)                    | 11 of 24 (46%)                  | 5 of 8 (63%)                 | 4 of 18 (22%)                  | 17 of 45 (38%)                   | <b>0.003</b>                         | <b>&lt;0.001</b> | 0.658            | <b>0.006</b> |
| Tocilizumab (%)                                  | 4 of 27 (15%)                   | n/a                             | n/a                          | n/a                            | n/a                              | n/a                                  | n/a              | n/a              | n/a          |
| Hydroxychloroquine (%)                           | 14 of 27 (52%)                  | n/a                             | n/a                          | n/a                            | n/a                              | n/a                                  | n/a              | n/a              | n/a          |
| Other Antivirals Plasma                          | 10 of 27 (37%)<br>1 of 27 (4%)  | n/a                             | n/a                          | n/a                            | n/a                              | n/a                                  | n/a              | n/a              | n/a          |

\*: Blood group (BG) distribution in the general population (Blood donor registry, Basel, Switzerland): BG 0= 39,5%, BG A= 44,7%, BG B= 11,1%, BG AB= 4,6%

\*\* : Partially overlapping patients (i.e. lung and lymph node specimens from identical patients); therefore, n ≠ the sum of the n of specific organs.

†: Last available values before exitus; no older than 72h. P-values were calculated by two-sided Fisher's exact test.

**TABLE S3 | Blood group distribution and Laboratory results**

|                                                              | COVID-19                                                  | Control lungs                                                 | Control hearts                                                 | Control lymph nodes        | All controls                                                  | P-values of differences COVID-19 vs. |                    |                    |                     |
|--------------------------------------------------------------|-----------------------------------------------------------|---------------------------------------------------------------|----------------------------------------------------------------|----------------------------|---------------------------------------------------------------|--------------------------------------|--------------------|--------------------|---------------------|
| <b>Blood groups*</b>                                         | (data on n=21)                                            | (data on n=22)                                                | (data on n=8)                                                  | (data on n=17)             | (data on n=42)                                                |                                      |                    |                    |                     |
| A                                                            | 9 (43%)                                                   | 10 (46%)                                                      | 4 (50%)                                                        | 9 (53%)                    | 21 (50 %)                                                     | 1.0                                  | 0.675              | 0.502              | 0.789               |
| B                                                            | 1 (5%)                                                    | 2 (9%)                                                        | 0                                                              | 1 (6%)                     | 3 (7%)                                                        | 1.0                                  | 1.0                | 1.0                | 1.0                 |
| AB                                                           | 1 (5%)                                                    | 2 (9%)                                                        | 0                                                              | 1 (6%)                     | 2 (5%)                                                        | 1.0                                  | 1.0                | 1.0                | 1.0                 |
| 0                                                            | 10 (48%)                                                  | 8 (36%)                                                       | 4 (50%)                                                        | 6 (35%)                    | 16 (38%)                                                      | 0.543                                | 1.0                | 0.720              | 0.589               |
| <b>Laboratory results†</b>                                   | <b>(n=28)</b>                                             | <b>(n=24)</b>                                                 | <b>(n=9)</b>                                                   | <b>(n=23)</b>              | <b>(n=51**)</b>                                               | <b>Lungs only</b>                    | <b>Hearts only</b> | <b>Lymph nodes</b> | <b>All controls</b> |
| D-dimer (µg/ml)                                              | Median 3.7 (mean 8.3)<br>range: 0.43->20<br>(data on n=9) | Median 3.37 (mean 6.28)<br>range: 0.42-18.49<br>(data on n=5) | Median 3.89 (mean 3.89)<br>(range: 2.15-5.64)<br>(data on n=2) | n/a<br>(n=1: 18.49)        | Median 3.37 (mean 5.6;<br>range: 0.42-18.49)<br>(data on n=7) | 0.639                                | 0.792              | 0.614              | 0.710               |
| INR, median (IQR, range)                                     | 1.5<br>(0.6; 1.2-3.7)                                     | 1.25<br>(0.83; 0.9-3.8)                                       | 1.2<br>(1.43; 1.2-3.2)                                         | 1.1<br>(0.25; 0.9-2)       | 1.2<br>(0.65; 0.9-3.8)                                        | 0.359                                | 0.523              | <b>0.011</b>       | 0.077               |
| CRP, mg/dl, median (IQR, range)                              | 172<br>(168; 13-512)                                      | 118<br>(182; 4.1-610)                                         | 56<br>(221; 8.6-276)                                           | 75<br>(183; 0.4-335)       | 90<br>(177; 0.4-610)                                          | 0.115                                | 0.079              | 0.056              | <b>0.018</b>        |
| Platelets (10 <sup>9</sup> /l), median (IQR, range)          | 197<br>(223; 16-434)                                      | 149<br>(237; 22-523)                                          | 124<br>(323; 19-631)                                           | 211<br>(224; 42-523)       | 162<br>(218; 19-631)                                          | 0.266                                | 0.576              | 0.6                | 0.276               |
| Leucocytes (10 <sup>9</sup> /l), median (IQR, range)         | 8.8<br>(5.69; 1.75-32.35)                                 | 10.79<br>(12.15; 0.55-39.56)                                  | 9.37<br>(12.23; 1.39-26.82)                                    | 10.23<br>(11.88; 4-30.9)   | 9.63<br>(9.6; 0.55-39.56)                                     | 0.249                                | 0.922              | 0.318              | 0.400               |
| Lymphocytes (10 <sup>9</sup> /l), median (IQR, range)        | 0.7<br>(0.59; 0.21-14.9)                                  | 0.74<br>(0.9; 0.04-11.6)                                      | 0.56<br>(0.28; 0.19-0.61)                                      | 1.61<br>(3.72; 0.57-14.96) | 0.74<br>(1.01; 0.04-14.96)                                    | 0.812                                | 0.441              | <b>0.036</b>       | 0.633               |
| Neutrophilic granulocytes (10 <sup>9</sup> /l), median (IQR) | 7.03<br>(5.49; 3.2-28.85)                                 | 9.45<br>(13.47; 0.43-28.45)                                   | 6.4<br>(12.3; 0.68-15.7)                                       | 6.88<br>(9.91; 2.19-27.65) | 7.82<br>(8.81; 0.43-28.45)                                    | 0.209                                | 0.849              | 0.922              | 0.787               |

\*: Blood group (BG) distribution in the general population (Blood donor registry, Basel, Switzerland): BG 0= 39,5%, BG A= 44,7%, BG B= 11,1%, BG AB= 4,6%

\*\* : Partially overlapping patients (i.e. lung and lymph node specimens from identical patients); therefore, n ≠ the sum of the n of specific organs.

†: Last available values before exitus; no older than 72h. P-values were calculated by two-sided tests (i.e. Fisher's exact test and Mann-Whitney U test).
